# Supplementary material
Source: PubMed Central journal article supplement (PMC7489885)
Supplement: mmc1.pdf [file mmc1.pdf]

## **Supplemental Information**

### **Structurally Resolved SARS-CoV-2 Antibody Shows High Efficacy in Severely Infected Hamsters and Provides a Potent Cocktail Pairing Strategy**

**Shuo Du, Yunlong Cao, Qinyu Zhu, Pin Yu, Feifei Qi, Guopeng Wang, Xiaoxia Du, Linlin Bao, Wei Deng, Hua Zhu, Jiangning Liu, Jianhui Nie, Yinghui Zheng, Haoyu Liang, Ruixue Liu, Shuran Gong, Hua Xu, Ayijiang Yisimayi, Qi Lv, Bo Wang, Runsheng He, Yunlin Han, Wenjie Zhao, Yali Bai, Yajin Qu, Xiang Gao, Chenggong Ji, Qisheng Wang, Ning Gao, Weijin Huang, Youchun Wang, X. Sunney Xie, Xiao-dong Su, Junyu Xiao, and Chuan Qin**

**Table S1. Cryo-EM data collection, processing and validation statistics, Related to Figure 1**

| S-6P in complex with three BD-368-2 Fabs<br>(PDB ID: 7CHH; EMDB ID: EMD-30374) |                                                            |
|--------------------------------------------------------------------------------|------------------------------------------------------------|
| <b>Data collection and processing</b>                                          |                                                            |
| Voltage (kV)                                                                   | 300                                                        |
| Microscope                                                                     | FEI Titan Krios G3                                         |
| Camera                                                                         | K2 Summit (Gatan)                                          |
| Magnification (calibrated)                                                     | 130,000X                                                   |
| Electron exposure ( $e^-/\text{\AA}^2$ )                                       | 59.80                                                      |
| Exposure rate ( $e^-/\text{\AA}^2/\text{s}$ )                                  | 7.1875                                                     |
| Number of frames collected per micrograph                                      | 32                                                         |
| Energy filter slit width                                                       | 20 eV                                                      |
| Automation software                                                            | SerialEM                                                   |
| Defocus range ( $\mu\text{m}$ )                                                | -0.7 to -1.2                                               |
| Pixel size ( $\text{\AA}$ )                                                    | 1.055                                                      |
| Micrographs used                                                               | 5,273                                                      |
| Symmetry imposed                                                               | C1                                                         |
| Initial particle images                                                        | 586,005                                                    |
| Final particle images                                                          | 85,053                                                     |
| Resolution at 0.5 FSC of masked reconstruction ( $\text{\AA}$ )                | 3.98                                                       |
| Resolution at 0.143 FSC of masked reconstruction ( $\text{\AA}$ )              | 3.49                                                       |
| Map sharpening B factor ( $\text{\AA}^2$ )                                     | -52.34                                                     |
| <b>Refinement</b>                                                              |                                                            |
| Initial model used (PDB code)                                                  | 6VSB                                                       |
| Refinement package                                                             | Phenix v1.18 (Real-space refinement at 3.49 $\text{\AA}$ ) |
| Map-model CC                                                                   |                                                            |
| CC_mask                                                                        | 0.77                                                       |
| CC_box                                                                         | 0.76                                                       |
| CC_peaks                                                                       | 0.64                                                       |
| CC_volume                                                                      | 0.75                                                       |
| Model composition                                                              |                                                            |
| Non-hydrogen atoms                                                             | 29,029                                                     |
| Protein residues                                                               | 3,704                                                      |
| Ligands                                                                        | 41                                                         |
| R.m.s. deviations                                                              |                                                            |
| Bond lengths ( $\text{\AA}$ )                                                  | 0.007                                                      |
| Bond angles ( $^\circ$ )                                                       | 1.086                                                      |
| <i>B</i> factors ( $\text{\AA}^2$ )                                            |                                                            |
| Protein                                                                        | 84.97                                                      |
| Ligands                                                                        | 80.33                                                      |
| Validation                                                                     |                                                            |
| MolProbity score                                                               | 2.04                                                       |
| Clashscore                                                                     | 4.86                                                       |
| Poor rotamers (%)                                                              | 3.56                                                       |
| Ramachandran plot                                                              |                                                            |
| Favored (%)                                                                    | 94.70                                                      |
| Allowed (%)                                                                    | 5.24                                                       |
| Disallowed (%)                                                                 | 0.06                                                       |
| C $\beta$ outliers (%)                                                         | 0.00                                                       |
| CaBLAM outliers (%)                                                            | 3.61                                                       |

**Table S3. Crystal data collection and refinement statistics, Related to Figure 6**

|                                      | BD-236/RBD<br>(PDB ID: 7CHB)                    | BD-604/RBD<br>(PDB ID: 7CH4)                   | BD-629/RBD<br>(PDB ID: 7CH5)                   | BD-236/RBD/BD-368-2<br>(PDB ID: 7CHE)          | BD-604/RBD/BD-368-2<br>(PDB ID: 7CHF)          | BD-629/RBD/BD-368-2<br>(PDB ID: 7CHC)          |
|--------------------------------------|-------------------------------------------------|------------------------------------------------|------------------------------------------------|------------------------------------------------|------------------------------------------------|------------------------------------------------|
| <b>Data collection</b>               |                                                 |                                                |                                                |                                                |                                                |                                                |
| Resolution (Å)                       | 2.40                                            | 3.15                                           | 2.70                                           | 3.42                                           | 2.67                                           | 2.71                                           |
| Space group                          | C 2                                             | C 2                                            | P 2 <sub>1</sub> 2 <sub>1</sub> 2 <sub>1</sub> |
| Unit cell                            | 195.6 Å, 86.8 Å,<br>56.4 Å, $\beta=100.1^\circ$ | 197.9 Å, 85.5 Å,<br>57.1 Å, $\beta=99.8^\circ$ | 56.0 Å, 102.3 Å,<br>164.8 Å                    | 100.0 Å, 114.3 Å,<br>117.0 Å                   | 99.9 Å, 116.2 Å,<br>115.8 Å                    | 101.9 Å, 105.7 Å,<br>110.5 Å                   |
| Multiplicity                         | 6.8 (6.9)                                       | 6.8 (6.8)                                      | 12.2 (11.1)                                    | 12.7 (11.7)                                    | 11.3 (6.2)                                     | 13.0 (11.9)                                    |
| Completeness (%)                     | 99.6 (99.2)                                     | 99.7 (99.6)                                    | 99.5 (96.4)                                    | 94.4 (56.8)                                    | 96.0 (70.8)                                    | 99.8 (98.9)                                    |
| Mean I/sigma (I)                     | 15.2 (2.2)                                      | 7.8 (2.0)                                      | 13.8 (2.5)                                     | 11.6 (2.1)                                     | 16.2 (2.1)                                     | 12.5 (2.0)                                     |
| Wilson B-factor                      | 43.8                                            | 57.3                                           | 38.2                                           | 64.1                                           | 42.3                                           | 38.4                                           |
| R <sub>merge</sub>                   | 0.17 (0.93)                                     | 0.20 (0.68)                                    | 0.25 (1.03)                                    | 0.28 (1.57)                                    | 0.36 (4.21)                                    | 0.28 (1.75)                                    |
| R <sub>meas</sub>                    | 0.18 (1.01)                                     | 0.21 (0.74)                                    | 0.26 (1.07)                                    | 0.29 (1.64)                                    | 0.28 (4.56)                                    | 0.29 (1.83)                                    |
| R <sub>pim</sub>                     | 0.07 (0.38)                                     | 0.08 (0.28)                                    | 0.07 (0.31)                                    | 0.08 (0.47)                                    | 0.11 (1.73)                                    | 0.08 (0.52)                                    |
| CC <sub>1/2</sub>                    | 0.98 (0.80)                                     | 0.96 (0.82)                                    | 0.99 (0.91)                                    | 0.98 (0.69)                                    | 0.99 (0.14)                                    | 0.99 (0.69)                                    |
| <b>Refinement</b>                    |                                                 |                                                |                                                |                                                |                                                |                                                |
| Reflections used in refinement       | 36334 (3590)                                    | 16331 (1611)                                   | 26713 (2557)                                   | 17722 (1036)                                   | 37204 (2714)                                   | 32997 (3192)                                   |
| Reflections used for R-free          | 1815 (178)                                      | 816 (81)                                       | 1337 (128)                                     | 1771 (101)                                     | 1866 (140)                                     | 1649 (139)                                     |
| R <sub>work</sub> /R <sub>free</sub> | 0.192/0.227                                     | 0.227/0.273                                    | 0.226/0.260                                    | 0.221/0.234                                    | 0.220/0.270                                    | 0.212/0.285                                    |
| Number of non-hydrogen atoms         | 4893                                            | 4729                                           | 4687                                           | 7955                                           | 8008                                           | 7985                                           |
| macromolecules                       | 4676                                            | 4729                                           | 4687                                           | 7955                                           | 8008                                           | 7985                                           |
| ligands                              | 28                                              | 0                                              | 0                                              | 0                                              | 0                                              | 0                                              |
| solvent                              | 189                                             | 0                                              | 0                                              | 0                                              | 0                                              | 0                                              |
| Protein residues                     | 616                                             | 619                                            | 607                                            | 1047                                           | 1052                                           | 1042                                           |
| RMS(bonds)                           | 0.003                                           | 0.004                                          | 0.006                                          | 0.027                                          | 0.012                                          | 0.005                                          |
| RMS(angles)                          | 0.67                                            | 0.79                                           | 0.98                                           | 2.92                                           | 1.45                                           | 0.94                                           |
| Ramachandran favored (%)             | 95.86                                           | 93.29                                          | 95.33                                          | 93.02                                          | 93.74                                          | 95.62                                          |
| Ramachandran allowed (%)             | 3.97                                            | 6.38                                           | 4.17                                           | 6.69                                           | 5.97                                           | 4.09                                           |
| Ramachandran outliers (%)            | 0.17                                            | 0.33                                           | 0.50                                           | 0.29                                           | 0.29                                           | 0.29                                           |
| Average B-factor                     | 50.7                                            | 48.4                                           | 44.8                                           | 54.8                                           | 41.2                                           | 31.8                                           |

Each dataset was collected from a single crystal. Statistics for the highest-resolution shell are shown in parentheses.
